# Supplementary material for: A New OXA-66-harboring Acinetobacter Baumannii Sub-Clonal Complex 195 is Spreading Widely in Guangzhou, China, A Multicenter Study
Source: Research Square preprint supplement (doi:10.21203/rs.3.rs-96878/v1), 2020-10-28
Supplement: Supplementary file 1 [file 0208fcad9a01034525eb6284.xlsx]

## Sheet: Sheet1
Supplementary table 2. Antimicrobial susceptibility testing of 138 A. baumannii isolates
isolate ID	Hospital	Specimens	Wards	SCF#	TZP	CAZ	CRO	FEP	ATM	IPM	MEM	LEV	CIP	AK	GM	TGC	PB#	SXT	Phenotype
isolate_1	GFPH	Sputum	ICU	14	》128	》64	》64	》64	》64	》16	》16	4	》4	》64	》16	0.5	16	《20	MDR
isolate_2	GFPH	Blood	ICU	10	》128	》64	》64	》64	》64	》16	》16	4	》4	32	》16	0.5	14	》320	XDR
isolate_3	GFPH	Sputum	ICU	15	》128	》64	》64	》64	》64	》16	》16	》8	》4	》64	》16	0.5	15	》320	XDR
isolate_4	GFPH	Blood	ICU	6	》128	》64	》64	》64	》64	》16	》16	》8	》4	》64	》16	0.5	14	》320	XDR
isolate_5	GFPH	BAL	RICU	14	》128	》64	》64	》64	》64	》16	》16	》8	》4	》64	》16	0.5	15	《20	MDR
isolate_6	GFPH	Sputum	RICU	6	》128	》64	》64	》64	》64	》16	》16	》8	》4	8	》16	0.5	15	》320	MDR
isolate_7	GFPH	Sputum	Department of Respiratory medicine	8	》128	》64	》64	》64	》64	》16	》16	》8	》4	》64	》16	0.5	14	》320	XDR
isolate_8	GFPH	Sputum	RICU	15	》128	》64	》64	》64	》64	》16	》16	》8	》4	》64	》16	0.5	14	《20	MDR
isolate_9	GFPH	Sputum	ICU	6	》128	》64	》64	》64	》64	》16	》16	》8	》4	》64	》16	0.5	15	《20	MDR
isolate_10	GFPH	Sputum	Department of Respiratory medicine	14	》128	》64	》64	》64	》64	》16	》16	》8	》4	》64	》16	0.5	15	》320	XDR
isolate_11	GFPH	Sputum	Department of Neurosurgery	6	》128	》64	》64	》64	》64	》16	》16	》8	》4	》64	》16	0.5	15	》320	XDR
isolate_12	GFPH	Sputum	RICU	6	》128	》64	》64	》64	》64	》16	》16	》8	》4	4	》16	0.5	14	》320	MDR
isolate_13	GFPH	Sputum	Department of Respiratory medicine	6	》128	》64	》64	》64	》64	》16	》16	》8	》4	》64	》16	0.5	15	《20	MDR
isolate_14	GFPH	Sputum	ICU	22	》128	》64	》64	》64	》64	》16	8	》8	》4	》64	》16	0.5	17	》320	MDR
isolate_15	GFPH	BAL	RICU	14	》128	》64	》64	》64	》64	》16	》16	》8	》4	》64	》16	0.5	14	《20	MDR
isolate_16	GFPH	Sputum	ICU	6	》128	》64	》64	》64	》64	》16	》16	》8	》4	》64	》16	0.5	15	》320	XDR
isolate_17	GFPH	Wound	Department of Gastroenterology	6	》128	》64	》64	》64	》64	》16	》16	》8	》4	》64	》16	0.5	15	》320	XDR
isolate_18	GFPH	Sputum	Department of Respiratory medicine	10	》128	》64	》64	》64	》64	》16	》16	》8	》4	》64	》16	0.5	14	》320	XDR
isolate_19	GFPH	Sputum	ICU	6	》128	》64	》64	》64	》64	》16	》16	》8	》4	》64	》16	0.5	14	》320	XDR
isolate_20	GFPH	Urine	ICU	16	》128	》64	》64	》64	》64	》16	》16	》8	》4	》64	》16	0.5	15	》320	XDR
isolate_21	GFPH	BAL	RICU	10	》128	》64	》64	》64	》64	》16	》16	》8	》4	》64	》16	0.5	15	《20	MDR
isolate_22	GFPH	BAL	RICU	6	》128	》64	》64	》64	》64	》16	》16	》8	》4	》64	》16	1	15	》320	XDR
isolate_23	GFPH	Sputum	Department of Respiratory medicine	18	》128	》64	》64	》64	》64	》16	》16	》8	》4	》64	》16	0.5	15	《20	MDR
isolate_24	GFPH	Sputum	ICU	16	64	》64	》64	》64	》64	8	8	》8	》4	2	8	0.25	15	》320	MDR
isolate_25	GFPH	Sputum	RICU	15	》128	》64	》64	》64	》64	》16	》16	》8	》4	》64	》16	0.5	16	》320	XDR
isolate_26	GFPH	Sputum	RICU	15	》128	》64	》64	》64	》64	》16	》16	》8	》4	》64	》16	0.25	15	《20	MDR
isolate_27	GFPH	Sputum	Department of Neurosurgery	6	》128	》64	》64	32	》64	》16	8	》8	》4	32	》16	1	15	》320	XDR
isolate_28	GFPH	Sputum	Department of Respiratory medicine	18	》128	》64	》64	》64	》64	》16	》16	》8	》4	》64	》16	0.5	16	》320	XDR
isolate_29	GFPH	Sputum	RICU	10	》128	》64	》64	》64	》64	》16	》16	》8	》4	》64	》16	0.25	16	》320	XDR
isolate_30	GFPH	Sputum	RICU	6	》128	》64	》64	》64	》64	》16	》16	》8	》4	8	》16	0.5	16	》320	MDR
isolate_31	GFPH	Sputum	Department of Respiratory medicine	15	》128	》64	》64	》64	》64	》16	》16	》8	》4	》64	》16	2	15	》320	XDR
isolate_32	GFPH	Sputum	Department of Neurosurgery	17	》128	》64	》64	32	》64	2	《1	》8	》4	》64	》16	0.5	15	》320	MDR
isolate_33	GFPH	Sputum	ICU	15	》128	》64	》64	》64	》64	》16	》16	》8	》4	》64	》16	0.5	15	《20	MDR
isolate_34	GFPH	BAL	RICU	6	》128	》64	》64	》64	》64	》16	》16	》8	》4	》64	》16	2	15	》320	XDR
isolate_35	GFPH	CSF	ICU	12	》128	》64	》64	》64	》64	》16	》16	》8	》4	》64	》16	0.5	15	《20	MDR
isolate_36	GFPH	Sputum	General Internal Medicine Department	16	》128	》64	》64	》64	》64	》16	》16	4	》4	》64	》16	4	15	》320	XDR
isolate_37	GFPH	Sputum	ICU	10	》128	》64	》64	》64	》64	》16	》16	》8	》4	》64	》16	0.5	15	》320	XDR
isolate_38	GFPH	Wound	Burn surgery department	10	》128	》64	》64	》64	》64	》16	》16	》8	》4	》64	》16	0.5	15	》320	XDR
isolate_39	GFPH	Sputum	Geriatrics ICU	15	》128	》64	》64	》64	》64	》16	》16	》8	》4	》64	》16	0.25	15	》320	XDR
isolate_40	GFPH	Blood	Department of Urology Surgery	6	》128	》64	》64	》64	》64	》16	》16	》8	》4	》64	》16	0.5	15	》320	XDR
isolate_41	GFPH	Sputum	Nephrology Department	17	》128	》64	》64	》64	》64	8	8	》8	》4	》64	》16	2	15	》320	XDR
isolate_42	GFPH	BAL	RICU	20	《4	》64	》64	》64	》64	《1	《1	4	》4	》64	》16	2	15	》320	MDR
isolate_43	GFPH	Sputum	RICU	11	》128	》64	》64	》64	》64	》16	》16	4	》4	4	》16	0.5	15	《20	MDR
isolate_44	GFPH	Sputum	RICU	7	》128	》64	》64	》64	》64	》16	》16	4	》4	4	》16	0.5	15	《20	MDR
isolate_45	GFPH	Sputum	ICU	13	》128	》64	》64	》64	》64	》16	》16	》8	》4	》64	》16	2	15	》320	XDR
isolate_46	GFPH	Sputum	Neurology ICU	8	》128	》64	》64	》64	》64	》16	》16	》8	》4	》64	》16	0.5	15	》320	XDR
isolate_47	GFPH	Sputum	ICU	7	》128	》64	》64	》64	》64	》16	》16	》8	》4	》64	》16	0.5	15	》320	XDR
isolate_48	GFPH	Blood	ICU	12	》128	》64	》64	》64	》64	》16	》16	》8	》4	》64	》16	0.5	16	》320	XDR
isolate_49	GFPH	Sputum	Geriatrics ICU	11	》128	》64	》64	》64	》64	》16	》16	》8	》4	》64	》16	0.5	15	》320	XDR
isolate_50	GFPH	Sputum	ICU	15	》128	》64	》64	》64	》64	》16	》16	》8	》4	》64	》16	0.5	15	》320	XDR
isolate_51	GFPH	Sputum	Geriatrics ICU	7	》128	》64	》64	》64	》64	》16	》16	4	》4	8	》16	0.5	16	》320	MDR
isolate_52	GFPH	Sputum	Department of Respiratory medicine	6	》128	》64	》64	》64	》64	》16	》16	4	》4	8	》16	4	16	》320	MDR
isolate_53	GFPH	Sputum	Geriatrics ICU	6	》128	》64	》64	》64	》64	》16	》16	》8	》4	》64	》16	4	16	》320	XDR
isolate_54	GFPH	Sputum	ICU	13	》128	》64	》64	》64	》64	》16	》16	》8	》4	》64	》16	0.5	15	《20	MDR
isolate_55	GFPH	Sputum	Neurology ICU	14	》128	》64	》64	》64	》64	》16	》16	》8	》4	》64	》16	0.5	15	《20	MDR
isolate_56	GFPH	Urine	ICU	7	》128	》64	》64	》64	》64	》16	》16	4	》4	》64	》16	0.5	15	《20	MDR
isolate_57	GFPH	Sputum	Department of Neurology	8	》128	》64	》64	》64	》64	》16	》16	》8	》4	》64	》16	4	15	》320	XDR
isolate_58	GFPH	Sputum	Department of Neurosurgery	11	》128	》64	》64	》64	》64	》16	》16	》8	》4	》64	》16	0.5	15	》320	XDR
isolate_59	GFPH	Sputum	ICU	6	》128	》64	》64	》64	》64	》16	》16	》8	》4	》64	》16	0.5	15	《20	MDR
isolate_60	GFPH	Sputum	ICU	13	》128	》64	》64	》64	》64	》16	》16	》8	》4	》64	》16	1	15	》320	XDR
isolate_61	GFPH	Sputum	RICU	10	》128	》64	》64	》64	》64	》16	》16	》8	》4	》64	》16	0.5	15	》320	XDR
isolate_62	GFPH	Sputum	ICU	6	》128	》64	》64	》64	》64	》16	》16	》8	》4	》64	》16	0.5	14	》320	XDR
isolate_63	GFPH	Blood	Department of Gastrointestinal Surgery	11	》128	》64	》64	》64	》64	》16	》16	》8	》4	》64	》16	0.5	15	》320	XDR
isolate_64	GFPH	Sputum	GeriatricsICU	7	》128	》64	》64	》64	》64	》16	》16	4	》4	》64	8	0.5	14	《20	MDR
isolate_65	GFPH	Blood	Burn surgery department	13	》128	》64	》64	》64	》64	》16	》16	》8	》4	》64	》16	4	15	《20	MDR
isolate_66	GFPH	Sputum	ICU	8	》128	》64	》64	》64	》64	》16	》16	》8	》4	》64	》16	0.5	15	》320	XDR
isolate_67	GXH	Sputum	ICU	7	》128	》64	》64	》64	》64	》16	》16	》8	》4	》64	》16	4	14	《20	MDR
isolate_68	GXH	Sputum	Department of Stomatology	12	》128	》64	》64	》64	》64	》16	》16	》8	》4	》64	》16	0.5	14	》320	XDR
isolate_69	GXH	Sputum	ICU	11	》128	》64	》64	》64	》64	》16	》16	4	》4	》64	》16	2	15	《20	MDR
isolate_70	GXH	Sputum	Department of Respiratory medicine	14	》128	》64	》64	》64	》64	》16	》16	》8	》4	》64	》16	4	15	》320	XDR
isolate_71	GXH	Sputum	ICU	11	》128	》16	》64	》64	》64	》16	》16	》8	》4	》64	》16	0.5	15	》320	XDR
isolate_72	FAH	Blood	MICU	10	》128	》64	》64	》64	》64	》16	》16	》8	》4	》64	》16	4	16	》320	XDR
isolate_73	FAH	Blood	Department of Hematology	6	》128	》64	》64	》64	》64	》16	》16	》8	》4	》64	》16	2	15	》320	XDR
isolate_74	FAH	Blood	Intervention Department	30	《4	4	》64	4	16	《1	《1	《0.25	《0.25	《2	》16	2	17	《20	MDR
isolate_75	FAH	Sputum	SICU	8	》128	》64	》64	》64	》64	》16	》16	》8	》4	》64	》16	2	14	》320	XDR
isolate_76	FAH	Sputum	Department of Cardiology	11	》128	》64	》64	》64	》64	》16	》16	》8	》4	》64	》16	2	15	》320	XDR
isolate_77	FAH	Sputum	Department of Neurology	25	《4	《1	8	《1	2	4	1	2	1	《2	《1	2	16	》320	Non-resisitant
isolate_78	FAH	Sputum	Department of Neurology	12	》128	》64	》64	》64	》64	》16	》16	》8	》4	》64	》16	2	15	》320	XDR
isolate_79	FAH	Sputum	PICU	13	》128	》64	》64	》64	》64	》16	》16	》8	》4	》64	》16	2	15	》320	XDR
isolate_80	FAH	Blood	Department of Pediatric Surgery	26	《4	4	16	8	》64	《1	《1	《0.25	《0.25	4	《1	0.5	17	《20	Non-resisitant
isolate_81	FAH	Sputum	Neurology ICU	28	《4	4	16	4	32	《1	《1	0.5	0.5	4	《1	0.5	17	》320	MDR
isolate_82	FAH	Sputum	Traditional Chinese Medicine Department	8	》128	》64	》64	》64	》64	》16	》16	》8	》4	》64	》16	2	14	》320	XDR
isolate_83	FAH	Blood	SICU	10	》128	》64	》64	》64	》64	》16	》16	4	》4	》64	》16	1	15	》320	XDR
isolate_84	FAH	ADF	SICU	6	》128	》64	》64	》64	》64	》16	》16	4	》4	》64	》16	1	15	》320	XDR
isolate_85	FAH	Blood	MICU	11	》128	》64	16	》64	》64	》16	》16	4	》4	8	《1	2	15	》320	MDR
isolate_86	FAH	Blood	Department of Urology Surgery	25	《4	16	16	8	32	《1	《1	《0.25	《0.25	2	《1	2	16	《20	MDR
isolate_87	FAH	Sputum	MICU	15	》128	》64	》64	》64	》64	》16	》16	4	》4	》64	》16	2	15	《20	MDR
isolate_88	FAH	Urine	Department of Neurology	11	》128	》64	》64	》64	》64	》16	》16	》8	》4	》64	》16	4	14	》320	XDR
isolate_89	FAH	Sputum	SICU	13	》128	》64	》64	》64	》64	》16	》16	4	》4	》64	》16	2	15	》320	XDR
isolate_90	FAH	Sputum	MICU	15	64	》64	》64	》64	》64	8	8	》8	》4	》64	》16	2	15	《20	MDR
isolate_91	FAH	Blood	Department of Hematology	34	《4	16	8	2	8	《1	《1	《0.25	《0.25	4	《1	0.5	18	《20	Non-resisitant
isolate_92	FAH	ADF	Burn surgery department	15	》128	》64	》64	》64	》64	》16	》16	》8	》4	》64	》16	4	15	《20	MDR
isolate_93	FAH	Sputum	SICU	15	》128	》64	》64	》64	》64	》16	》16	》8	》4	》64	》16	2	14	》320	XDR
isolate_94	FAH	Sputum	Emergency department	13	》128	》64	》64	》64	》64	》16	》16	》8	》4	》64	》16	2	15	》320	XDR
isolate_95	FAH	Blood	Emergency department	10	》128	》64	》64	》64	》64	》16	》16	4	》4	》64	》16	2	14	》320	XDR
isolate_96	FAH	Blood	Intervention Department	10	》128	》64	》64	》64	》64	》16	》16	4	》4	》64	》16	2	15	《20	MDR
isolate_97	FAH	Blood	Burn surgery department	11	》128	》64	》64	》64	》64	》16	》16	4	》4	》64	》16	1	15	》320	XDR
isolate_98	FAH	Blood	MICU	10	》128	》64	》64	》64	》64	》16	》16	4	》4	》64	》16	1	14	》320	XDR
isolate_99	FAH	Blood	SICU	17	》128	》64	》64	》64	》64	》16	》16	2	》4	》64	》16	0.5	16	》320	XDR
isolate_100	FAH	Sputum	Department of Neurology	6	》128	》64	》64	》64	》64	》16	》16	》8	》4	》64	》16	》8	15	》320	XDR
isolate_101	FAH	Sputum	Department of Cardiology	10	》128	》64	》64	》64	》64	》16	》16	4	》4	》64	》16	2	15	《20	MDR
isolate_102	FAH	Sputum	MICU	13	》128	》64	》64	》64	》64	》16	》16	2	》4	》64	》16	0.5	17	》320	MDR
isolate_103	FAH	Sputum	MICU	12	》128	》64	》64	》64	》64	》16	》16	4	》4	》64	》16	1	15	》320	XDR
isolate_104	GRCH	Wound	Department of Gastrointestinal Surgery	18	》64	》16	》64	》16	》64	》8	》8	》8	》2	》32	》8	0.5	16	》40	XDR
isolate_105	GRCH	Bile	ICU	12	》64	》16	》64	》16	》64	》8	》8	》8	》2	》32	》8	0.5	16	》40	XDR
isolate_106	GRCH	Sputum	ICU	14	》64	》16	》64	》16	》64	》8	》8	》8	》2	》32	》8	0.5	14	》40	XDR
isolate_107	GRCH	Wound	Burn surgery department	10	》64	》16	》64	》16	》64	》8	》8	》8	》2	》32	》8	0.5	16	》40	XDR
isolate_108	GRCH	Blood	ICU	13	》64	》16	》64	》16	》64	》8	》8	》8	》2	》32	》8	0.5	16	》40	XDR
isolate_109	GRCH	Sputum	Emergency department	9	》64	》16	》64	》16	》64	》8	》8	》8	》2	》32	》8	0.5	16	》40	XDR
isolate_110	GRCH	Sputum	Department of Respiratory medicine	6	》64	》16	》64	》16	》64	》8	》8	》8	》2	》32	》8	4	8	》40	XDR
isolate_111	GRCH	Wound	Burn surgery department	6	》64	》16	》64	》16	》64	》8	》8	》8	》2	》32	》8	0.5	16	》40	XDR
isolate_112	GRCH	Wound	Burn surgery department	13	》64	》16	》64	》16	》64	》8	》8	》8	》2	》32	》8	1	16	》40	XDR
isolate_113	GRCH	Wound	Department of endocrinology科	15	》64	》16	》64	》16	》64	》8	》8	》8	》2	》32	》8	0.5	16	》40	XDR
isolate_114	GRCH	Sputum	Emergency department	12	》64	》16	》64	》16	》64	》8	》8	》8	》2	》32	》8	1	16	》40	XDR
isolate_115	GRCH	Sputum	Emergency department	6	》64	》16	》64	》16	》64	》8	》8	》8	》2	》32	》8	1	16	》40	XDR
isolate_116	GRCH	Sputum	Department of Gastrointestinal Surgery	12	》64	》16	》64	》16	》64	》8	》8	》8	》2	》32	》8	0.5	16	》40	XDR
isolate_117	GRCH	Sputum	Emergency department	6	》64	》16	》64	》16	》64	》8	》8	》8	》2	》32	》8	4	16	》40	XDR
isolate_118	GRCH	Sputum	Emergency department	12	》64	》16	》64	》16	》64	》8	》8	》8	》2	》32	》8	0.5	16	》40	XDR
isolate_119	GRCH	Sputum	Emergency department	6	》64	》16	》64	》16	》64	》8	》8	》8	》2	》32	》8	2	16	》40	XDR
isolate_120	GRCH	Sputum	Emergency department	17	》64	》16	》64	》16	》64	》8	》8	》8	》2	》32	》8	0.5	16	》40	XDR
isolate_121	GRCH	Wound	Department of Orthopedics	26	16	8	16	16	16	《1	《1	《1	《0.5	《8	《2	0.5	16	》40	MDR
isolate_122	GRCH	Sputum	ICU	11	》64	》16	》64	》16	》64	》8	》8	》8	》2	》32	》8	2	16	》40	XDR
isolate_123	GRCH	Sputum	Department of Neurology	6	》64	》16	》64	》16	》64	》8	》8	》8	》2	》32	》8	0.5	16	》40	XDR
isolate_124	GRCH	Urine	ICU	12	》64	》16	》64	》16	》64	》8	》8	》8	》2	》32	》8	2	16	》40	XDR
isolate_125	GRCH	Sputum	Emergency department	6	》64	》16	》64	》16	》64	》8	》8	》8	》2	》32	》8	4	16	》40	XDR
isolate_126	GRCH	CSF	ICU	6	》64	》16	》64	》16	》64	》8	》8	》8	》2	》32	》8	0.5	16	》40	XDR
isolate_127	GRCH	Sputum	Department of Gastrointestinal Surgery	6	》64	》16	》64	》16	》64	》8	》8	》8	》2	》32	》8	0.5	16	》40	XDR
isolate_128	GRCH	Sputum	Emergency department	6	》64	》16	》64	》16	》64	》8	》8	》8	》2	》32	》8	1	16	》40	XDR
isolate_129	GRCH	Sputum	Emergency department	6	》64	》16	》64	》16	》64	》8	》8	》8	》2	》32	》8	0.5	16	》40	XDR
isolate_130	GRCH	Sputum	Department of Respiratory medicine	12	》64	》16	》64	》16	》64	》8	》8	》8	》2	》32	》8	1	16	》40	XDR
isolate_131	GRCH	Sputum	ICU	6	》64	》16	》64	》16	》64	》8	》8	》8	》2	》32	》8	0.5	16	》40	XDR
isolate_132	GRCH	Wound	Burn surgery department	6	》64	》16	》64	》16	》64	》8	》8	》8	》2	》32	》8	0.5	16	》40	XDR
isolate_133	TAH	Sputum	ICU	10	》128	》64	》64	》64	》64	》16	》16	4	》4	》64	》16	2	15	《20	MDR
isolate_134	TAH	Sputum	ICU	13	》128	》64	》64	》64	》64	》16	》16	》8	》4	》64	》16	0.5	15	》320	XDR
isolate_135	TAH	Sputum	ICU	9	》128	》64	》64	》64	》64	》16	》16	4	》4	》64	8	0.5	14	《20	MDR
isolate_136	TAH	Sputum	ICU	17	》128	》64	》64	32	》64	2	《1	》8	》4	》64	》16	0.5	15	》320	MDR
isolate_137	TAH	Sputum	ICU	16	》128	》64	》64	32	》64	2	2	》8	》4	》64	》16	2	16	《20	MDR
isolate_138	TAH	Sputum	ICU	6	》128	》64	》64	》64	》64	》16	》16	》8	》4	》64	》16	1	14	》320	XDR
GFPH,Guangzhou First People’s Hospital; GXH, Guangzhou Xinhai Hospital;FAH,the First Affiliated Hospital of Sun Yat-sen University；GRCH,Guangzhou Red Cross Hospital;TAH,the Third Affiliated Hospital of Sun Yat-sen University; ICU,intensive care units; RICU,respiratory intensive care unit; SICU,surgical intensive care unit; MICU,medical intensive care unit; PICU,pediatric intensive care unit; BAL,…
