# Supplementary material for: A New OXA-66-harboring Acinetobacter Baumannii Sub-Clonal Complex 195 is Spreading Widely in Guangzhou, China, A Multicenter Study
Source: Research Square preprint supplement (doi:10.21203/rs.3.rs-96878/v1), 2020-10-28
Supplement: Supplementary file 2 [file 5f7bc192610486b6cd69297b.xlsx]

## Sheet: Sheet1
Supplementary table 3. 225 A. baumannii isolates in China based on the data contained in the Pubmlst database as of 22 May 2017
Isolate	Isolate fields				MLST (Oxford)
No.	id	country	year	source	gltA	gyrB	gdhB	recA	cpn60	gpi	rpoD	ST
Isolate-1	72	China	2005	wound	1	3	3	2	2	7	3	92
Isolate-2	73	China	2005	IV catheter	1	43	50	31	1	50	26	96
Isolate-3	96	China	2007	lower respiratory tract	1	3	3	2	2	7	3	92
Isolate-4	104	China	2005	N/A	1	3	3	2	2	7	3	92
Isolate-5	105	China	2005	N/A	1	3	3	2	2	7	3	92
Isolate-6	106	China	2005	N/A	1	3	3	2	2	10	3	88
Isolate-7	107	China	2005	N/A	1	3	3	2	2	11	3	75
Isolate-8	108	China	2005	N/A	1	3	3	2	2	7	3	92
Isolate-9	109	China	2005	N/A	1	3	3	2	2	62	3	90
Isolate-10	110	China	2005	N/A	1	15	13	12	4	12	2	20
Isolate-11	111	China	2005	N/A	22	15	13	12	4	62	2	91
Isolate-12	112	China	2005	N/A	1	12	12	11	4	10	3	17
Isolate-13	113	China	2005	N/A	10	12	4	11	1	9	5	95
Isolate-14	114	China	2005	N/A	1	43	50	31	1	50	26	96
Isolate-15	255	China	2009	lower respiratory tract	1	3	3	2	2	16	3	136
Isolate-16	256	China	2008	IV catheter	1	3	3	2	2	12	3	137
Isolate-17	257	China	2008	IV catheter	1	3	3	2	2	50	3	138
Isolate-18	367	China	2009	lower respiratory tract	1	3	3	2	2	7	3	92
Isolate-19	368	China	2009	lower respiratory tract	1	3	3	2	2	7	3	92
Isolate-20	369	China	2009	lower respiratory tract	1	3	3	2	2	7	3	92
Isolate-21	370	China	2009	lower respiratory tract	1	3	3	2	2	11	3	75
Isolate-22	371	China	2009	lower respiratory tract	1	3	3	2	2	7	3	92
Isolate-23	372	China	2009	wound	1	3	3	2	2	11	3	75
Isolate-24	373	China	2009	lower respiratory tract	1	3	3	2	2	11	3	75
Isolate-25	374	China	2009	lower respiratory tract	1	3	3	2	2	7	3	92
Isolate-26	375	China	2009	lower respiratory tract	1	3	3	2	2	7	3	92
Isolate-27	376	China	2009	lower respiratory tract	1	3	3	2	2	11	3	75
Isolate-28	377	China	2009	lower respiratory tract	1	3	3	2	2	7	3	92
Isolate-29	379	China	2009	lower respiratory tract	1	3	3	2	2	7	3	92
Isolate-30	380	China	2009	lower respiratory tract	1	3	3	2	2	7	3	92
Isolate-31	381	China	2009	lower respiratory tract	1	3	3	2	2	11	3	75
Isolate-32	382	China	2009	lower respiratory tract	1	3	3	2	2	11	3	75
Isolate-33	383	China	2009	lower respiratory tract	1	3	3	2	2	11	3	75
Isolate-34	384	China	2009	N/A	1	3	3	2	2	7	3	92
Isolate-35	385	China	2009	lower respiratory tract	1	3	3	2	2	11	3	75
Isolate-36	386	China	2009	lower respiratory tract	1	3	3	2	2	11	3	75
Isolate-37	387	China	2009	N/A	1	3	3	2	2	50	3	138
Isolate-38	388	China	2009	N/A	1	3	3	2	2	7	3	92
Isolate-39	389	China	2009	N/A	1	3	3	2	2	50	3	138
Isolate-40	390	China	2009	N/A	1	3	3	2	2	50	3	138
Isolate-41	391	China	2009	N/A	1	3	3	2	2	12	3	137
Isolate-42	393	China	2009	N/A	1	3	3	2	2	7	3	92
Isolate-43	394	China	2009	N/A	1	3	3	2	2	12	3	137
Isolate-44	395	China	2009	N/A	1	3	3	2	2	7	3	92
Isolate-45	396	China	2009	N/A	1	3	3	2	2	11	3	75
Isolate-46	397	China	2009	wound	36	31	59	28	4	54	4	184
Isolate-47	398	China	2009	lower respiratory tract	1	17	3	2	2	56	3	223
Isolate-48	399	China	2009	lower respiratory tract	1	17	3	2	2	56	3	223
Isolate-49	400	China	2009	blood	36	31	59	28	4	54	4	184
Isolate-50	408	China	2009	lower respiratory tract	1	3	3	2	2	7	3	92
Isolate-51	409	China	2009	lower respiratory tract	1	3	3	2	2	7	3	92
Isolate-52	410	China	2009	lower respiratory tract	1	3	3	2	2	7	3	92
Isolate-53	411	China	2009	lower respiratory tract	1	3	3	2	2	11	3	75
Isolate-54	412	China	2009	lower respiratory tract	1	3	3	2	2	7	3	92
Isolate-55	413	China	2009	wound	1	3	3	2	2	11	3	75
Isolate-56	414	China	2009	lower respiratory tract	1	3	3	2	2	11	3	75
Isolate-57	415	China	2009	lower respiratory tract	1	3	3	2	2	7	3	92
Isolate-58	416	China	2009	lower respiratory tract	1	3	3	2	2	7	3	92
Isolate-59	417	China	2009	lower respiratory tract	1	3	3	2	2	11	3	75
Isolate-60	418	China	2009	lower respiratory tract	1	3	3	2	2	7	3	92
Isolate-61	419	China	2009	lower respiratory tract	1	3	3	2	2	7	3	92
Isolate-62	420	China	2009	lower respiratory tract	1	3	3	2	2	7	3	92
Isolate-63	421	China	2009	lower respiratory tract	1	3	3	2	2	11	3	75
Isolate-64	422	China	2009	lower respiratory tract	1	3	3	2	2	11	3	75
Isolate-65	423	China	2009	lower respiratory tract	1	3	3	2	2	11	3	75
Isolate-66	424	China	2009	N/A	1	3	3	2	2	7	3	92
Isolate-67	425	China	2009	lower respiratory tract	1	3	3	2	2	11	3	75
Isolate-68	426	China	2009	lower respiratory tract	1	3	3	2	2	11	3	75
Isolate-69	427	China	2009	N/A	1	3	3	2	2	50	3	138
Isolate-70	428	China	2009	N/A	1	3	3	2	2	7	3	92
Isolate-71	429	China	2009	N/A	1	3	3	2	2	50	3	138
Isolate-72	430	China	2009	N/A	1	3	3	2	2	50	3	138
Isolate-73	431	China	2009	N/A	1	3	3	2	2	12	3	137
Isolate-74	432	China	2009	N/A	1	3	3	2	2	7	3	92
Isolate-75	433	China	2009	N/A	1	3	3	2	2	7	3	92
Isolate-76	434	China	2009	N/A	1	3	3	2	2	12	3	137
Isolate-77	435	China	2009	N/A	1	3	3	2	2	7	3	92
Isolate-78	436	China	2009	N/A	1	3	3	2	2	11	3	75
Isolate-79	437	China	2009	wound	36	31	59	28	4	54	4	184
Isolate-80	438	China	2009	lower respiratory tract	1	17	3	2	2	56	3	223
Isolate-81	439	China	2009	lower respiratory tract	1	17	3	2	2	56	3	223
Isolate-82	440	China	2009	blood	36	31	59	28	4	54	4	184
Isolate-83	441	China	2006	blood	1	34	12	6	1	18	45	224
Isolate-84	486	China	2008	N/A	1	3	3	2	2	50	3	138
Isolate-85	487	China	2008	upper respiratory tract	1	3	3	2	2	50	3	138
Isolate-86	490	China	2008	N/A	1	34	12	6	1	55	45	607
Isolate-87	493	China	N/A	N/A	1	12	3	2	2	102	3	350
Isolate-88	495	China	N/A	N/A	1	10	8	6	1	110	14	931
Isolate-89	499	China	2010	blood	21	15	3	2	35	111	4	254
Isolate-90	518	China	2009	lower respiratory tract	1	3	3	2	2	56	3	346
Isolate-91	536	China	2009	lower respiratory tract	51	54	49	11	48	25	4	363
Isolate-92	556	China	2010	blood	1	3	3	2	2	140	3	368
Isolate-93	557	China	2010	blood	1	3	3	2	2	106	3	369
Isolate-94	558	China	2010	IV catheter	1	3	3	2	2	50	3	138
Isolate-95	559	China	2010	lower respiratory tract	1	3	3	2	2	23	3	371
Isolate-96	560	China	2009	blood	1	3	3	2	2	12	3	137
Isolate-97	561	China	2009	blood	1	12	12	11	4	103	3	373
Isolate-98	562	China	2009	lower respiratory tract	1	3	3	2	2	11	3	75
Isolate-99	563	China	2009	blood	21	3	3	2	2	50	3	375
Isolate-100	564	China	2008	blood	21	35	2	28	1	83	4	376
Isolate-101	565	China	2008	blood	1	12	56	1	1	61	45	377
Isolate-102	566	China	2008	blood	22	15	13	12	4	62	2	91
Isolate-103	567	China	2008	blood	1	35	12	28	2	10	4	379
Isolate-104	568	China	2010	blood	1	3	2	28	2	52	32	380
Isolate-105	569	China	2008	blood	1	81	3	2	2	16	3	381
Isolate-106	570	China	2010	blood	50	86	120	6	2	132	70	382
Isolate-107	571	China	2008	blood	1	12	56	1	4	149	45	383
Isolate-108	572	China	2008	blood	1	12	12	11	2	148	3	384
Isolate-109	631	China	2012	lower respiratory tract	1	3	3	2	2	97	3	208
Isolate-110	632	China	2012	lower respiratory tract	1	3	3	2	2	16	3	136
Isolate-111	633	China	2012	lower respiratory tract	1	3	3	2	2	97	3	208
Isolate-112	634	China	2012	lower respiratory tract	1	3	3	2	2	97	3	208
Isolate-113	635	China	2012	lower respiratory tract	1	3	3	2	2	97	3	208
Isolate-114	636	China	2012	lower respiratory tract	1	3	3	2	2	97	3	208
Isolate-115	637	China	2012	lower respiratory tract	1	3	3	2	2	16	3	136
Isolate-116	638	China	2012	lower respiratory tract	1	3	3	2	2	96	3	195
Isolate-117	639	China	2011	N/A	1	31	12	11	4	25	3	427
Isolate-118	640	China	2011	N/A	21	15	2	28	1	52	4	428
Isolate-119	641	China	2011	N/A	1	34	56	1	4	144	45	429
Isolate-120	642	China	2011	N/A	1	31	49	10	1	103	4	430
Isolate-121	643	China	2011	N/A	34	12	68	41	1	104	4	431
Isolate-122	644	China	2011	N/A	34	12	68	41	32	104	4	432
Isolate-123	645	China	2011	N/A	1	81	3	1	2	16	3	433
Isolate-124	646	China	2011	N/A	1	34	56	1	4	144	45	429
Isolate-125	648	China	2009	N/A	1	54	80	28	48	127	45	435
Isolate-126	649	China	2009	lower respiratory tract	1	54	80	28	48	127	45	435
Isolate-127	2285	China	2007	CSF	22	15	13	12	4	169	2	642
Isolate-128	2294	China	2013	stool/rectal swab	1	114	12	54	1	165	68	378
Isolate-129	2314	China	2006	wound	1	43	50	31	1	94	26	940
Isolate-130	2667	China	2010	sputum	36	31	59	28	4	54	4	184
Isolate-131	2677	China	2012	sputum	1	12	12	11	4	103	3	373
Isolate-132	2678	China	2012	sputum	1	12	12	11	4	103	3	373
Isolate-133	2708	China	2006	blood	1	34	12	6	1	232	45	1016
Isolate-134	2757	China	N/A	N/A	1	3	3	2	2	106	3	369
Isolate-135	2758	China	2006	blood	1	3	3	2	2	169	3	643
Isolate-136	2761	China	N/A	blood	1	3	3	2	2	102	3	218
Isolate-137	2762	China	N/A	abdominal fluid	1	3	3	2	2	140	3	368
Isolate-138	2783	China	2011	blood	1	3	3	2	2	140	3	368
Isolate-139	2784	China	2011	blood	1	3	3	2	2	140	3	368
Isolate-140	2810	China	2005	sputum	1	3	3	2	2	97	3	208
Isolate-141	2822	China	2008	CSF	21	15	3	2	35	202	4	806
Isolate-142	2823	China	N/A	sputum	21	15	3	2	35	202	4	806
Isolate-143	2933	China	2013	sputum	1	3	3	2	2	96	3	195
Isolate-144	2934	China	2013	wound	1	15	3	2	2	153	3	457
Isolate-145	2935	China	2013	wound	1	15	3	2	2	153	3	457
Isolate-146	2936	China	2013	sputum	1	3	3	2	2	97	3	208
Isolate-147	2937	China	2013	IV catheter	1	15	3	2	2	153	3	457
Isolate-148	2938	China	2013	sputum	1	3	3	2	2	97	3	208
Isolate-149	2939	China	2013	sputum	1	3	3	2	2	97	3	208
Isolate-150	2940	China	2012	sputum	1	81	3	2	2	16	3	381
Isolate-151	3071	China	2014	lower respiratory tract	1	3	3	2	2	97	3	208
Isolate-152	3092	China	2013	N/A	1	3	21	11	36	98	43	1168
Isolate-153	3093	China	2013	N/A	31	102	13	32	26	198	7	1169
Isolate-154	3094	China	2013	N/A	56	104	137	67	55	111	75	1170
Isolate-155	3095	China	2013	N/A	1	62	80	28	35	96	45	1171
Isolate-156	3096	China	2013	N/A	1	35	56	1	12	264	26	1172
Isolate-157	3097	China	2013	N/A	1	35	56	1	1	264	26	1173
Isolate-158	3098	China	2013	N/A	1	35	56	1	1	264	26	1173
Isolate-159	3099	China	2013	N/A	33	12	2	28	1	193	4	1175
Isolate-160	3100	China	2013	N/A	1	12	12	11	4	191	3	1176
Isolate-161	3101	China	2013	N/A	56	129	137	7	51	170	74	1177
Isolate-162	3102	China	2013	N/A	56	129	137	7	51	153	74	1178
Isolate-163	3103	China	2010	N/A	56	129	137	7	51	145	74	1179
Isolate-164	3104	China	2013	N/A	33	31	2	28	1	144	5	1181
Isolate-165	3105	China	2013	N/A	1	12	56	1	1	107	26	1182
Isolate-166	3106	China	2013	N/A	27	65	99	55	25	103	60	1183
Isolate-167	3107	China	2013	N/A	1	47	67	28	1	103	6	1184
Isolate-168	3108	China	2013	N/A	27	70	128	30	25	255	29	1185
Isolate-169	3109	China	2010	N/A	30	39	157	52	39	202	56	1186
Isolate-170	3110	China	2013	N/A	1	17	82	39	1	198	7	1187
Isolate-171	3111	China	2013	N/A	1	47	13	11	53	198	4	1188
Isolate-172	3112	China	2013	N/A	1	47	13	11	53	198	4	1188
Isolate-173	3113	China	2013	N/A	33	31	2	23	23	191	5	1189
Isolate-174	3114	China	2013	N/A	31	54	8	6	30	176	6	1190
Isolate-175	3115	China	2010	N/A	91	104	137	7	84	174	88	1191
Isolate-176	3116	China	2010	N/A	18	48	58	42	4	174	26	1192
Isolate-177	3117	China	2013	N/A	1	34	80	28	1	172	45	1193
Isolate-178	3118	China	2013	N/A	1	34	80	28	1	172	45	1193
Isolate-179	3119	China	2013	N/A	1	34	62	31	4	172	45	1194
Isolate-180	3120	China	2013	N/A	21	121	64	11	36	170	5	1195
Isolate-181	3121	China	2013	N/A	1	34	135	6	1	160	45	1196
Isolate-182	3122	China	2013	N/A	1	71	139	11	26	153	26	1197
Isolate-183	3123	China	2013	N/A	1	34	80	28	2	144	45	1198
Isolate-184	3124	China	2010	N/A	1	34	56	1	1	144	26	1199
Isolate-185	3125	China	2010	N/A	1	34	56	1	1	144	26	1199
Isolate-186	3126	China	2013	N/A	33	12	40	26	32	143	5	1200
Isolate-187	3127	China	2013	N/A	31	98	8	6	30	142	6	1201
Isolate-188	3128	China	2013	N/A	33	12	40	26	32	140	5	1202
Isolate-189	3129	China	2013	N/A	1	56	130	10	1	140	4	1203
Isolate-190	3130	China	2013	N/A	1	12	80	35	35	140	45	1204
Isolate-191	3131	China	2013	N/A	11	36	14	2	37	140	15	1205
Isolate-192	3132	China	2010	N/A	91	104	137	7	84	140	88	1206
Isolate-193	3133	China	2013	N/A	56	5	145	7	6	129	10	1207
Isolate-194	3134	China	2013	N/A	1	33	11	48	18	114	43	1208
Isolate-195	3135	China	2013	N/A	34	97	80	41	4	103	4	1209
Isolate-196	3136	China	2013	N/A	21	12	68	41	4	103	4	1210
Isolate-197	3137	China	2013	N/A	1	49	3	12	4	97	3	1211
Isolate-198	3138	China	2013	N/A	56	5	145	7	6	97	10	1212
Isolate-199	3139	China	2013	N/A	59	129	85	87	6	97	11	1213
Isolate-200	3140	China	2010	N/A	62	6	141	67	52	97	10	1214
Isolate-201	3141	China	2013	N/A	21	35	2	28	1	96	4	1215
Isolate-202	3142	China	2013	N/A	1	102	80	28	35	83	30	1216
Isolate-203	3143	China	2013	N/A	1	34	62	31	60	61	30	1217
Isolate-204	3144	China	2013	N/A	1	34	62	31	35	61	30	1218
Isolate-205	3145	China	2013	N/A	1	34	135	11	4	16	45	1219
Isolate-206	3146	China	2013	N/A	1	62	80	28	35	202	45	1220
Isolate-207	3147	China	2013	N/A	1	12	12	11	4	109	3	1221
Isolate-208	3148	China	2013	N/A	1	35	12	11	4	96	3	1222
Isolate-209	3171	China	2009	N/A	1	15	3	2	2	153	3	457
Isolate-210	3172	China	2009	wound	1	3	3	2	2	140	3	368
Isolate-211	3173	China	2010	sputum	21	15	3	2	35	202	4	806
Isolate-212	3174	China	2010	other	1	81	3	2	2	16	3	381
Isolate-213	3175	China	2010	sputum	22	15	13	12	4	169	2	642
Isolate-214	3408	China	2014	urine	51	12	49	11	48	109	4	1477
Isolate-215	3409	China	2014	sputum	1	34	67	31	4	160	45	1478
Isolate-216	3410	China	2015	urine	33	31	2	28	1	145	5	1479
Isolate-217	3411	China	2015	sputum	21	31	113	11	1	106	3	1480
Isolate-218	3412	China	2015	sputum	33	15	2	28	1	158	5	1481
Isolate-219	3413	China	2015	sputum	21	35	2	28	1	175	4	1482
Isolate-220	3414	China	2015	sputum	2	12	73	59	1	98	47	1483
Isolate-221	3415	China	2013	sputum	1	47	67	28	35	221	6	1484
Isolate-222	3416	China	2013	sputum	1	47	67	28	35	94	6	1485
Isolate-223	3417	China	2013	abscess	1	3	3	2	2	221	3	1486
Isolate-224	3418	China	2014	sputum	51	12	137	11	48	96	4	1487
Isolate-225	3489	China	N/A	N/A	77	164	179	109	106	300	88	1527
N/A，not available.
